# Supplementary material for: The kinase LYK5 is a major chitin receptor in Arabidopsis and forms a chitin-induced complex with related kinase CERK1
Source: eLife journal article supplement (doi:10.7554/elife.03766), 2014-10-23
Supplement: supp [file elife-03766-supp-v1.zip]

| Primer         | sequence (5'-3')                                          |
|----------------|-----------------------------------------------------------|
| CERK1F         | GGGGACAAGTTTGTACAAAAAAGCAGGCTccATGAAGCTAAAGATTTCTCTAAT    |
| CERK1R         | GGGGACCACTTTGTACAAGAAAGCTGGGTtCCGGCCGGACATAAGACTGACT      |
| LYK2F          | GGGGACAAGTTTGTACAAAAAAGCAGGCTCCATGGCTGTTTCAGTTAGTAAGC     |
| LYK2R          | GGGGACCACTTTGTACAAGAAAGCTGGGTtATCTATTATACTACTCTTCTTTAC    |
| LYK3F          | GGGGACAAGTTTGTACAAAAAAGCAGGCTccATGAATCTTACCTTCTACATCTTC   |
| LYK3R          | GGGGACCACTTTGTACAAGAAAGCTGGGTtTCTTCCTTGGACTAGACCACT       |
| AtLYK4-F       | GGGGACAAGTTTGTACAAAAAAGCAGGCTCCATGATCTCGTTTTCATTC         |
| AtLYK4-R       | GGGGACCACTTTGTACAAGAAAGCTGGGTTGTACGACGATTCTTCCCAG         |
| LYK5F          | GGGGACAAGTTTGTACAAAAAAGCAGGCTCCATGGCTGCGTGTACTCCACG       |
| LYK5R          | GGGGACCACTTTGTACAAGAAAGCTGGGTtGTTGCCAAGAGAGCCGGAACGAAG    |
| LYK5-KinF      | TCGGAATTCTCATTACCGTCGTCGTTGCC                             |
| LYK5-KinR      | GGTGCTCGAGTTGCCAAGAGAGCCGGAACG                            |
| LYK5-K395EF    | GGCGACGATGCCGCTGTGGAAAGTGATCAAAGGAGATG                    |
| LYK5-K395ER    | CATCTCCTTTGATCACTTCCACAGCGGCATCGTCGCC                     |
| PromlyK5-1.8KF | GGGGACAAGTTTGTACAAAAAAGCAGGCTCCCCACAGTTATCTCTGGTTTGATTTAG |
| LYK5-NoKin-R   | GGGGACCACTTTGTACAAGAAAGCTGGGTTGAGCTTGTCTCTCCGGCAAC        |
| CERK1-KDF      | CTGAGAATTCTATGCTTACCGGAAGAATAAG                           |
| CERK1-KDR      | ACGTGTCGACCTACCGCCGGACATAAGACTGAC                         |
| LYK5-T72GF     | CAACCACCGTACAACGGGGCGGACTCAATCG                           |
| LYK5-T72GR     | CGATTGAGTCCGCCCGTTGTACGGTGGTTG                            |
| LYK5-S206PF    | CCATGGGAGATAGTATCCCCGGCATCGCCGAGATG                       |
| LYK5-S206PR    | CATCTCGCGATGCCGGGATACTATCTCCCATGG                         |
| LYK5-S216PF    | GATGTTCAACAGCACACCCGCCGATAACCGAAG                         |
| LYK5-S216PR    | CTTCGGTTATGGCGCGGGTGTGCTGTTGAACATC                        |
| LYK5-Y128GF    | CCAACACAACGCCACTGGCAATCTCTCCGGTAAC                        |
| LYK5-Y128GR    | GTTACCGGAGAGATTGCCAGTGGCGTTGTGTTGG                        |
| pHisThrom-F    | GTTTCCAGTCTCTGGTTCGCGTGGATCTCACCACCATCATCACTGG            |
| pHisThrom-R    | TGATGGTGGTGAGATCCACGCGGAACCAGAGACTGGAAACGCACGGTTTC        |
| LYK5EctoF      | TACTCCAATCCAATGCCAGCAACCGTACGTCAACAACCA                   |
| LYK5EctoR      | TTATCCACTTCCAATGTTATTTGTGAGAAGAAGAAGATCCCCGGAG            |
| CERK1EctoF     | CGCGGATCCAAGTGCAGGACTAGCTGTCCTTTA                         |
| CERK1EctoR     | CGCGTCGACTTAACCAACACCATCTGTTTACTTGA                       |
| WRKY29F        | ATCCAACGGATCAAGAGCTG                                      |
| WRKY29R        | GCGTCCGACAACAGATTCT                                       |
| WRKY30F        | AGCCAAATTTCCAAGAGGAT                                      |
| WRKY30R        | GCAGCTTGAGAGCAAGAATG                                      |
| UBQ10F         | GGCCTTGATAATCCCTGATGAATAAG                                |
| UBQ10R         | AAAGAGATAACAGGAACGGAAACATAGT                              |
| WRKY29F        | ATCCAACGGATCAAGAGCTG                                      |
| WRKY29R        | GCGTCCGACAACAGATTCT                                       |

|             |                                   |
|-------------|-----------------------------------|
| WRKY30F     | AGCCAAATTCCAAGAGGAT               |
| WRKY30R     | GCAGCTTGAGAGCAAGAATG              |
| UBQ10F      | GGCCTTGATAATCCCTGATGAATAAG        |
| UBQ10R      | AAAGAGATAACAGGAACGGAAACATAGT      |
| WRKY33F     | GGTCACAACAATCCGGAAGA              |
| WRKY33R     | GGAGAGACAAGAGAAGGAGAGA            |
| WRKY53F     | TCACCGAGCGTACAACCTTATTCC          |
| WRKY53R     | CGTTTATCGATGCCGGAGATT             |
| LYK5-qRT-F  | ATCGTACCTCGTCTTCGAGTAT            |
| LYK5-qRT-R  | TGCCACATCCCTTGCTATTT              |
| LYK4-qRT-F  | GGTTGAGACGAGCAAGACTTTA            |
| LYK4-qRT-R  | GAGGATTCACCAAAGGGATCAG            |
| CERK1-qRT-F | AAGACAAAGATAGAATCCAGACGGGCTCTAGGG |
| CERK1-qRT-R | TCCGCGACTCTTTCGTAAGTATCTTCCTGT    |

Table supplement 1. Primers used in this study.
